# Supplementary material for: CuInS2 Nanocrystals Embedded PMMA Composite Films: Adjustment of Polymer Molecule Weights and Application in Remote-Type White LEDs
Source: MDPI journal article supplement (doi:10.3390/nano13061085), 2023-03-17
Supplement: s1 [file s1]

Article

# **CuInS<sub>2</sub> Nanocrystals Embedded PMMA Composite Films: Adjustment of Polymer Molecule Weights and Application in Remote-Type White LEDs**

Qingchao Zhou \* and Zhongyi Shang

School of Jewelry, West Yunnan University of Applied Sciences, Tengchong  
679100, China; 2190235@wyuas.edu.cn

\* Correspondence: qczhou@wyuas.edu.cn

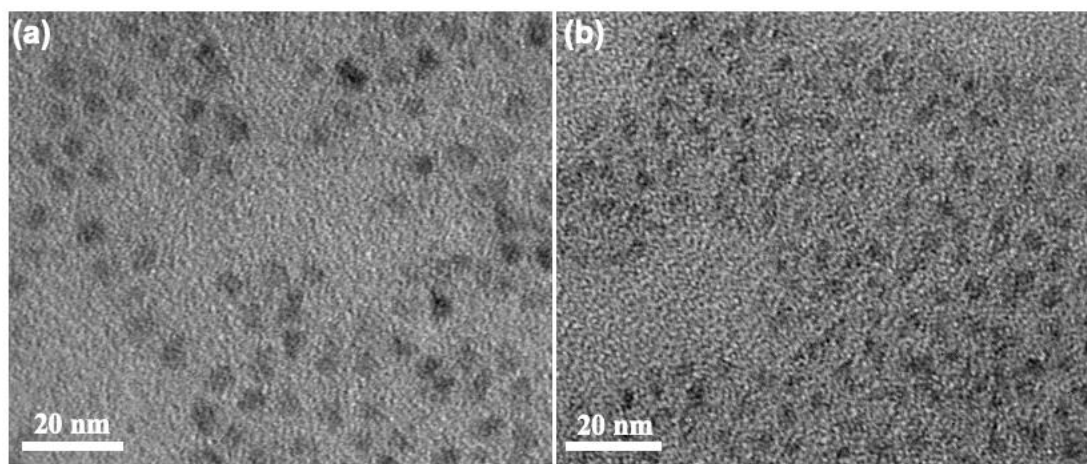

Figure S1. (a) TEM images of green emissive CuInS<sub>2</sub> NCs; (b) TEM images of red emissive CuInS<sub>2</sub> NCs.

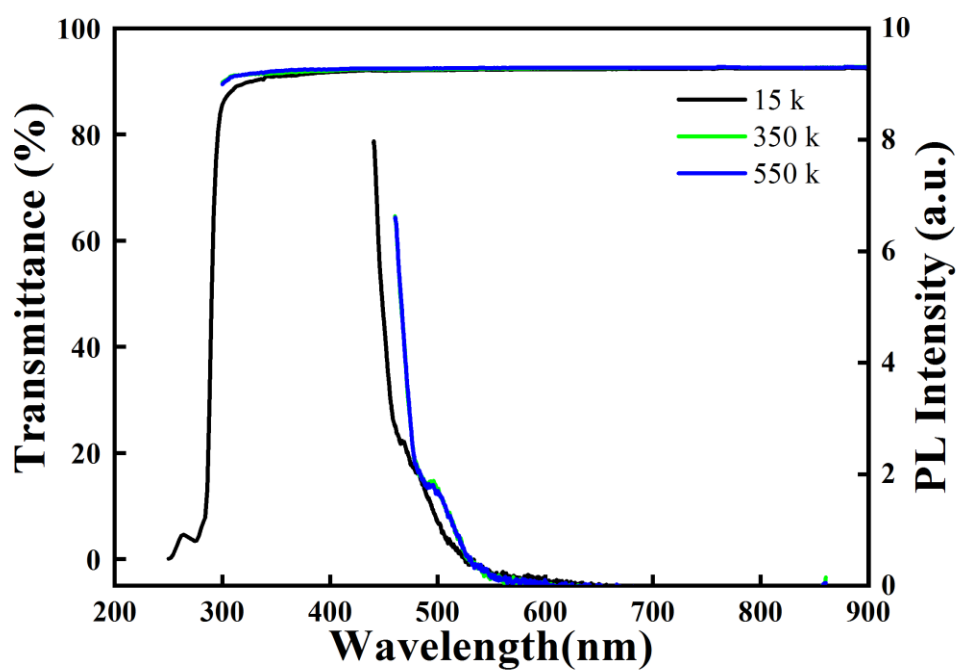

Figure S2. Transmittance and fluorescence spectra of PMMA films with different molecular weights.

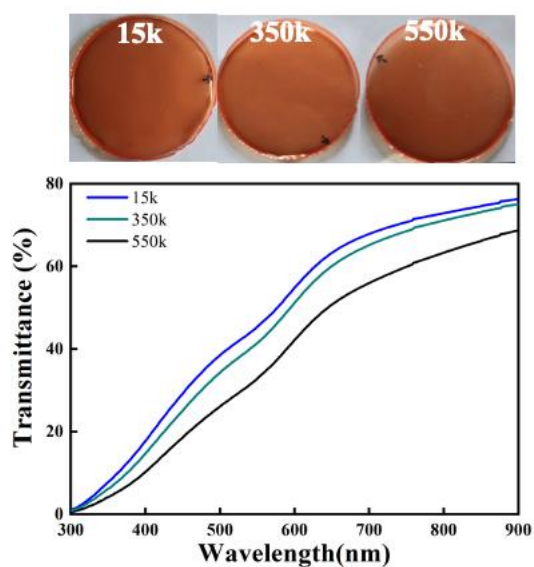

Figure S3. Transmittance spectra of composite films with 5wt% red emissive CuInS<sub>2</sub> NCs dispersed in PMMA with different molecular weights.
